# Supplementary material for: An endosiRNA-Based Repression Mechanism Counteracts Transposon Activation during Global DNA Demethylation in Embryonic Stem Cells
Source: PubMed Central journal article supplement (PMC5678422; doi:10.1016/j.stem.2017.10.004), 2017-11-02
Supplement: mmc1.pdf [file mmc1.pdf]

**Supplemental Information**

**An endosiRNA-Based Repression Mechanism  
Counteracts Transposon Activation during Global  
DNA Demethylation in Embryonic Stem Cells**

**Rebecca V. Berrens, Simon Andrews, Dominik Spensberger, Fátima Santos, Wendy Dean, Poppy Gould, Jafar Sharif, Nelly Olova, Tamir Chandra, Haruhiko Koseki, Ferdinand von Meyenn, and Wolf Reik**

# 1 Supplemental Information

2

## 3 Supplemental Figure Legends

4 **Figure S1. Global DNA demethylation and transcriptional change upon acute *Dnmt1* deletion,**  
5 **Related to Figure 1**

6 (A) WGBS-seq reads overlapping the whole Chromosome 2 between WT (day 1-day 11) and  
7 *Dnmt1* cKO ESCs induced for 1-11 days. Percentage of methylated cytosines were counted  
8 for each consecutive 50 CpG window genome-wide.

9 (B) Enrichment of CpG methylation over transcription starts sites (TSS) and gene body in WT  
10 and *Dnmt1* cKO ESCs induced 1 day (dark red), 3 days (light red), 6 days (light pink), 9 days  
11 (light blue), 11 days (dark blue). Measurement of 2 biological replicates. Percentage of  
12 methylated cytosines were counted for each consecutive 50 CpG window genome-wide.

13 (C) Bean plots showing distribution of methylation levels for genome features between WT  
14 (gray) and conditional *Dnmt1* cKO ESC induced for 1 day (dark red), 3 days (light red), 6  
15 days (light pink), 9 days (light blue), 11 days (dark blue). Low methylated regions (LMRs)  
16 (Stadler et al., 2011), enhancers defined by H3K4m1 (Chen et al., 2012) and H3K27ac  
17 (Creyghton et al., 2010). Measurement of 2 biological replicates. For significance analysis  
18 Wilcoxon rank sum test with Bonferroni correction testing with a p-value threshold of < 0.05  
19 was used.

20 (D) Chromosome view of RNA-seq reads over mRNA with Lx5 or MIRb TE sitting in the 2kb  
21 surrounding region of a coding gene. RNA-seq libraries are strand specific. Each read is  
22 depicted.

23 (E) Violin plots showing distribution of methylation levels for different TE classes between  
24 WT (gray) and conditional *Dnmt1* cKO ESC induced for 1 day (dark red), 3 days (light red), 6  
25 days (light pink), 9 days (light blue), 11 days (dark blue). Measurement of 2 biological  
26 replicates. For significance analysis Wilcoxon rank sum test with Bonferroni correction testing  
27 with a p-value threshold of < 0.05 was used.

28 (F) Graphs showing methylation retention of TE classes in comparison to the rest of the  
29 genome. Left: scatter plot of WGBS sequencing reads in gradient of gray with specific TE  
30 class as red dot, Right: Line graph of TE class in time course (red) in comparison to probes  
31 starting with the same methylation level as the respective TE class (blue) and in comparison,  
32 to the rest of the genome (gray). Measurement of 2 biological replicates.

33 (G) Scatter plot of all reads overlapping genes in the genome with the significantly *Dnmt1*  
34 responsive genes highlighted in black. Significance was called by combining both Intensity  
35 difference (SeqMonk) as well as DESeq2 significance called genes with a p-value threshold  
36 of < 0.05 and multiple testing correction.

37 (H) Venn Diagram of the number and overlap of mRNAs upregulated upon *Dnmt1* cKO.

38 (I) Bar graph of 6 genes in WT which were most highly upregulated and downregulated upon  
39 *Dnmt1* cKO induced 0 days (black), 1 day (dark red), 3 days (light red), 6 days (light pink), 9  
40 days (light blue), 11 days (dark blue). Dots show the expression level in the 2 RNA-seq  
41 libraries for each time point.

42 (J) Bar plots of expression of key pluripotency genes between WT (gray) and conditional  
43 *Dnmt1* cKO ESC not induced (black), induced for 1 day (dark red), 3 days (light red), 6 days  
44 (light pink), 9 days (light blue). Measurements of 2 biological replicate shown next to each  
45 other.

46 (K) Bar plot showing percentage of genic insertions of *Dnmt1* and *Dicer* responsive TEs in  
47 sense (red) and antisense (blue) direction to the respective genes.

48

49 **Figure S2. Genome wide small RNA response upon *Dnmt1* conditional KO, Related to Figure 2**

50 (A) Bar plots of small RNA size distribution as well as classification of different small RNA  
51 classes in *Dnmt1* cKO and WT ESCs mapped to the whole genome; miRNAs (gray), rRNA  
52 (green), small nuclear RNAs (snRNAs) (violet), miscellaneous other RNAs (misc RNAs)  
53 (red), small nucleolar RNAs (snoRNA) (orange) and tRNA (light blue) of WT (right) and after  
54 conditional *Dnmt1* cKO (left).

55 (B) Expression of endogenously transcribed miRNAs in WT (gray) and in conditional *Dnmt1*  
56 cKO induced for 1 day (dark red), 3 days (light red), 6 days (light pink), 9 days (light blue), 11  
57 days (dark blue). Error bars represent mean +/-SD of 3 technical replicates.

58 (C) Genic location of miRNA 200c with reads mapped in *Dnmt1* cKO and WT ESCs, each  
59 line representing one read.

60 (D) Scatter plot of all small RNAs in the genome, highlighting miRNAs of the *Dlk* cluster  
61 (black) and *Xlr3* cluster (green) at day 9 after *Dnmt1* cKO (y-axis) versus WT (x-axis).  
62 Significance was called by combining both Intensity difference (SeqMonk) as well as  
63 DESeq2 significance called genes with a p-value threshold of < 0.05 and multiple testing  
64 correction.

65 (E) Bar graph of 2 representative small RNAs of the *Xlr3* and *Dlk* locus in WT and upon  
66 *Dnmt1* cKO induced 1 day (dark red), 3 days (light red), 6 days (light pink), 9 days (light  
67 blue), 11 days (dark blue). Error bars represent mean +/-SD of 3 technical replicates.  
68 Statistics: two-sided Students t-test, \* p-value <0.05, \*\* p-value <0.005, \*\*\* p-value <0.0005.

69 (F) Confirmation of small RNA-seq data by small RNA quantitative real-time PCR analysis.  
70 Bar plot showing small RNA quantitative real-time PCR analysis of mmu-miR-543 and mmu-  
71 miR-367 in WT (gray) and conditional *Dnmt1* cKO induced for 9 days (dark red). Error bars  
72 represent mean +/-SD of 3 technical replicates. Statistics: two-sided Students t-test, \* p-value  
73 <0.05, \*\* p-value <0.005, \*\*\* p-value <0.0005.

74 (G) Chromosome view of WGBS-seq, total RNA-seq and small RNA-seq depicted as wiggle  
75 plots overlapping imprinted control regions (ICR), mRNA and small RNAs in WT and at day 9  
76 after *Dnmt1* deletion.

77 (H) Pie chart distribution showing mapping of small RNA-seq from AGO2 IP 9 days after  
78 conditional *Dnmt1* to different small RNA classes. miRNAs (black), repeats (dark green),  
79 3'UTRs (yellow), introns (dark blue), piRNAs (light blue), 5'UTRs (light green), others (gray).

80 (I) Bar plot showing nucleotide position 30 nt upstream and downstream of 5' end of AGO2  
81 IP small RNA-seq libraries mapping to repeats after conditional *Dnmt1* cKO induced 9 days.

82 (J) Bar plot showing small RNA duplex 5' to 5' overlap of AGO2 IP small RNA-seq mapping  
83 to repeats after conditional *Dnmt1* cKO induced 9 days.

84 (K) Small RNA-seq of 20-24 nt small RNAs mapped to TEs *in vivo* PGCs of E13.5 as well as  
85 E14.5 male (blue) and female (red) PGCs. Each library was done as 1 replicate.

86 (L) Pie chart distribution of small RNAs mapping to different genomic loci of *in vivo* E14.5  
87 male PGC small RNA-seq libraries after conditional *Dnmt1* cKO induced 9 days. miRNAs  
88 (black), repeats (dark green), 3'UTRs (yellow), introns (dark blue), 5'UTRs (light green),  
89 rRNA\_tRNA (gray), unannotated (white).

90 (M) Size distribution for *in vivo* E14.5 male PGCs of sense (blue) and antisense (red) small  
91 RNAs mapping to repeatmasker consensus sequences using piPipes small RNA pipeline.

92 (N) Bar plot showing siRNA duplex 5' to 5' overlap for *in vivo* E14.5 male PGC small RNA-  
93 seq libraries mapping to repeats.

94 (O) Bar plot showing nucleotide position 30 nt upstream and downstream of 5' end of *in vivo*  
95 E14.5 male PGC small RNA-seq library mapping to repeats.

96

97 **Figure S3. Characterisation of the involvement DICER and AGO2 in TE silencing, Related to Figure 3**

98 (A) Left: Schematic showing *Dicer* cKO generation using CRISPR by introducing loxP sites  
99 into Intron 14\_15 and Intron 20\_21. Agarose gel of PCR to screen for genomic recombination  
100 of 2 *Dicer/Dnmt1* conditional double cKO clones after addition of 4OHT for 3 days.  
101 Recombination of Intron 15-16 was tested with primer set 1, recombination of intron 20-21  
102 was tested with primer set 2 and recombination of both introns was tested with primer set 3,  
103 LD = 1000 bp DNA ladder. Middle: Quantitative real-time PCR analysis of *Dicer* mRNA upon  
104 CRE recombination induced by tamoxifen (4OHT) in clone 1 (light green) and clone 2 (dark  
105 green) of *Dicer* conditional KO ESCs. Error bars represent mean +/-SD of 3 technical  
106 replicates. Statistics: two-sided Students t-test, \* p-value <0.05, \*\* p-value <0.005, \*\*\* p-  
107 value <0.0005. Right: Quantitative real-time PCR analysis of *mmu-miR-93* expression in  
108 ESCs upon *Dicer* KO in clone 1 (light green) and clone 2 (dark green) controlled by snoRNA  
109 expression. Error bars represent mean +/-SD of 3 technical replicates. Statistics: two-sided  
110 Students t-test, \* p-value <0.05, \*\* p-value <0.005.

111 (B) Bar graph of percentage of genic antisense transcription over the time course of  
112 *Dicer/Dnmt1* cDKO, *Dicer* KO and *Dnmt1* cKO in KO over WT samples. Measurement of 2  
113 biological replicates for *Dicer/Dnmt1* cDKO and *Dnmt1* cKO and WT samples and 1 replicate  
114 for *Dicer* KO ESCs.

115 (C) Bar plots of small RNA size distribution as well as classification of different small RNA  
116 classes in *Dicer/Dnmt1* cDKO, *Dnmt1* cKO with KO induced for 4 days and *Dnmt1*<sup>fl/fl</sup> mESCs  
117 and WT mapped to the whole genome; miRNAs (light blue), rRNA (gray), small nuclear  
118 RNAs (snRNAs) (dark blue), miscellaneous other RNAs (misc RNAs) (orange), small  
119 nucleolar RNAs (snoRNA) (yellow) and tRNA (light green).

120 (D) Small RNA-seq of *Dicer/Dnmt1* cDKO and *Dnmt1* cKO ESCs normalised to WT ESCs  
121 mapped to IAPEz and L1MdGf TE classes. \*p<0.05, \*\*p<0.005, two-tailed student t-test.  
122 Measurement of 2 biological replicates.

123 (E) Schematic showing *Ago2* cKO generation using CRISPR by introducing loxP sites into  
124 Intron 8\_9 and Intron 11\_12 of *Ago2* mRNA. Agarose gel of PCR to screen for genomic  
125 recombination of four *Ago2/Dnmt1* cDKO clones after addition of 4OHT for 3 days in  
126 comparison to one WT clone. Recombination of Intron 8-12 was tested with primer set 1. LD  
127 = 100 bp DNA ladder.

128 (F) Quantitative real-time PCR analysis analysis of *Ago2* in ESCs following *Ago2/Dnmt1*  
129 cDKO by treatment with 4OHT or control (EtOH) for 3 days. Error bars represent mean +/-SD  
130 of 3 biological replicates in 3 technical replicates. Values were normalized to *Hspcb* and  
131 controlled to EtOH samples. Statistics: two-sided Students t-test, \* p-value <0.05, \*\* p-value  
132 <0.005.

133 (G) Immunofluorescence of AGO2 protein (purple) in *Ago2/Dnmt1* cDKO and *Dnmt1* cKO  
134 ESCs upon KO induction with 4OHT. Deletion was induced for 3 or 8 days as depicted.  
135 Nuclear DAPI counter staining (white). scale bar = 20µm.

136 (H) Upper panel: Schematic knock out strategy for *Dicer* in mouse ESCs constructing gRNAs  
137 against Exon 23 and 24 of *Dicer* mRNA. gRNA Protospacer Adjacent Motif (PAM) sequences  
138 (dark blue). (Bernstein et al., 2003). Lower left: Quantitative real-time PCR analysis of mRNA  
139 expression of *Dicer* in WT (black) and *Dicer* cKO (dark blue). Error bars represent mean +/-  
140 standard deviations of 3 technical replicates. Statistics: two-sided Students t-test, \* p-value  
141 <0.05, \*\* p-value <0.005, \*\*\* p-value <0.0005. Lower right: Expression level of *mmu-miR-93*  
142 in wildtype (black) and *Dicer* cKO (dark blue). Error bars represent mean +/-standard  
143 deviations of 3 technical replicates. Statistics: two-sided Students t-test, \* p-value <0.05, \*\* p-  
144 value <0.005, \*\*\* p-value <0.0005,

145 (I) Upper panel: Schematic of knock out strategy for *Ago2* in mouse ESCs constructing  
146 gRNAs against Intron 13-14 and 115 of *Dicer* mRNA. gRNA PAM sequences (light green).  
147 Lower panel: Quantitative real-time PCR analysis of *Ago2* expression in 2 clones of *Ago2* KO

148 ESCs (dark purple) in comparison to *Dnmt1*<sup>fl/fl</sup> ESCs (black). Error bars represent mean +/-  
149 standard deviations of 3 technical replicates. Statistics: two-sided Students t-test, \* p-value  
150 <0.05, \*\* p-value <0.005, \*\*\* p-value <0.0005,  
151 (J) Immunofluorescence of AGO2 protein (purple) and NANOG (green) in *Ago2* KO/*Dnmt1*  
152 cKO and mouse embryonic fibroblasts. Nuclear DAPI counter staining (white). scale bar =  
153 20µm.  
154 (K) Bar plots of expression of 5 pluripotency genes between WT (gray) and conditional  
155 *Dnmt1* cKO ESC induced for 11 days (dark blue), *Dicer* KO (light blue) treated with EtOH for  
156 1 day and 11 days, *Dicer* KO/*Dnmt1* DKO (faint blue) treated with 4OHT for 1 and 11 days.  
157 (L) Scatter plot of RNA-seq data of *Dicer* KO (y-axis) versus WT (x-axis) ESCs. Differentially  
158 expressed genes were called by intensity difference of SeqMonk (black), all other genes are  
159 depicted in gray.  
160 (M) Chromosome view of read count quantitation across the 4 genes *Lin28*, *Dnmt3l*, *Fbln2*  
161 and *Oct4*. High bars indicated high expression, low bars indicate low expression. Every bar  
162 overlaps at least 1 read.  
163 (N) Quantitative real-time PCR analysis data of LINE and major satellites in *Dicer* KO/*Dnmt1*  
164 cKO following conditional *Dnmt1* cKO, by treatment with 4OHT. Error bars represent SD of 3  
165 technical replicates. Values were normalized to *Atp5b*, *Hspcb* and Major satellites to U1.  
166 Error bars represent mean +/-standard deviations of 3 technical replicates. Statistics: two-  
167 sided Students t-test, \* p-value <0.05, \*\* p-value <0.005, \*\*\* p-value <0.0005,  
168 (O) Heatmap of unbiased hierarchical clustering of all TE classes responsive *Dicer*  
169 KO/*Dnmt1* cKO versus *Dnmt1* cKO. Heatmap is showing relative expression (z-score) of TEs  
170 upon *Dnmt1* cKO and were generated using the pheatmap R library.

171

172 **Figure S4. Distribution of repressive histone marks – H3K9me3, H3K9me2 and H3K27me3 in ESCs**  
173 **upon *Dnmt1* cKO, Related to Figure 4**

174 (A) Pie chart of enrichment of H3K27me3, H3K9me3 and H3K9me2 in repeats (dark violet),  
175 genic regions (light violet), promoters (dark green), CGIs (middle green), intergenic regions  
176 (light green) in wildtype ESCs.  
177 (B) Probe enrichment of H3K9me3 (green), H3K9me2 (yellow) and H3K27me3 (blue) over  
178 gene body and TSS in wildtype ESCs.  
179 (C) Aligned probe plot of H3K27me3 enrichment surrounding 5kb of TSS in wildtype ESCs.  
180 (D) Scatter plot of repressive histone marks overlapping genes in wildtype (y-axis) versus  
181 *Dnmt1* cKO (x-axis) ESCs.  
182 (E) Read count plots of ChIP enrichment of H3K9me3 (green), H3K27me3 (blue) and  
183 H3K9me2 (yellow) over a 500kbp region in Chromosome 12. Intensity of the enrichment on  
184 the y-axis. Plots were generated using SeqMonk read count quantitation.

185 (F) Read count plots of H3K9me3 enrichment over IAPEZ in *Dnmt1* cKO at day 4 (red), day  
186 8 (blue) and in WT (gray). Plots were generated using SeqMonk read count quantitation.  
187 (G) Bar graph of enrichment of H3K27me3, H3K9me3 and H3K9me2 in repeats (dark violet),  
188 genic regions (light violet), promoters (dark green), CGIs (middle green), intergenic regions  
189 (light green) in WT ESCs, *Dnmt1* cKO, *Dicer* KO and *Dicer/Dnmt1* cDKO  
190 (H) Read count plots of ChIP-seq enrichment of H3K9me3, H3K27me3 and H3K9me2 at  
191 three genomic loci in *Dicer/Dnmt1* cDKO at day 11 (light blue), *Dicer* KO (middle blue),  
192 *Dnmt1* cKO at day 11 (dark blue) and WT (gray). Enrichment intensity shown on y-axis. Plots  
193 were generated using SeqMonk read count quantitation.  
194 (I) Summary of TE classes across WGBS-seq, RNA-seq, small RNA-seq and ChIP-seq  
195 libraries. Scale from red (loose) to green (gain).

196

197

## 198 **Supplemental Tables**

199 ***Table S1: List of differentially expressed genes upon *Dnmt1* KO and *Dicer* KO, Related to Figure 1***  
200 ***and S1 and Figure 3 and S3.***

201 Differentially expressed genes were called using the overlap between the SeqMonk Intensity  
202 difference as well as DESeq2.

203

204 ***Table S2: Quantitative real-time PCR analysis primers, Related to Figure 3 and S3***

205 Primers below have been used for expression analyses (Quantitative real-time PCR analysis  
206 primers).

207

208 ***Table S3: CRISPR primers, Related to Figure 3, S3***

209 CRISPR primers were used to construct *Dicer* KO/*Dnmt1* cKO and *Dicer/Dnmt1* cDKO, *Ago2*  
210 KO/*Dnmt1* cKO and *Ago2/Dnmt1* cDKO mouse ES cells. gRNA (guide RNA).

211

## 212 **Supplemental Data**

213 Data S1: Raw code to analyse TEs, Related to Figure 1-4.

214

215

216

217

218

# Figure S1

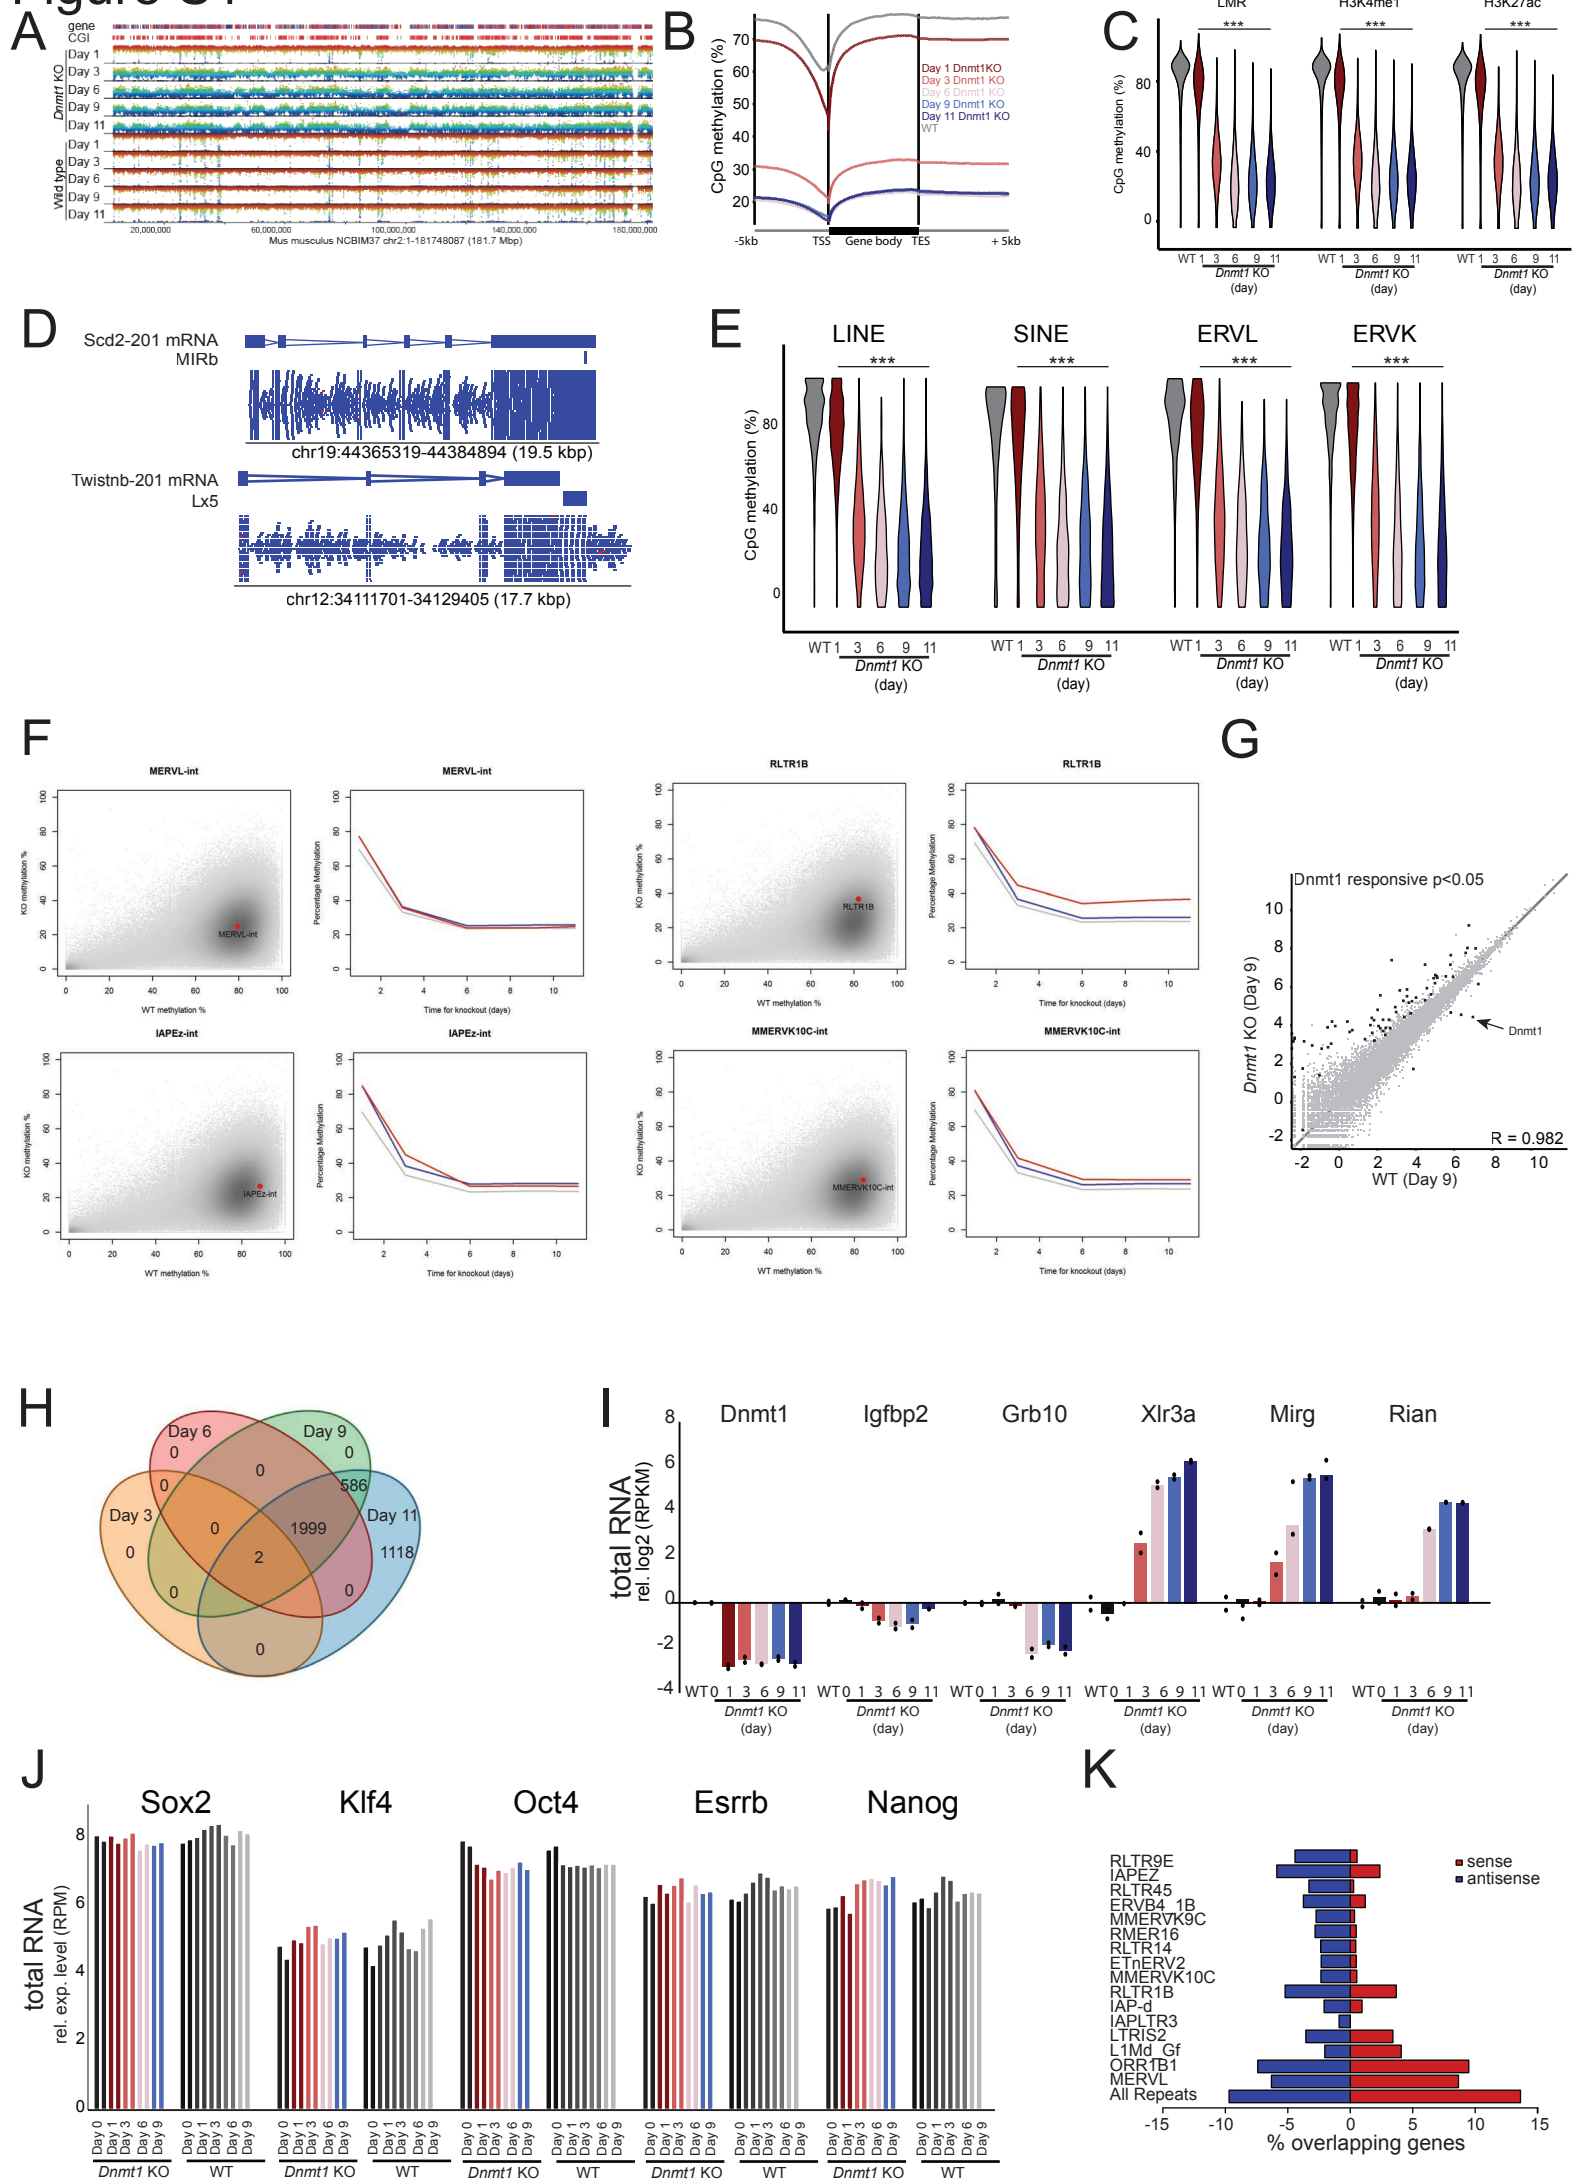



# Figure S2

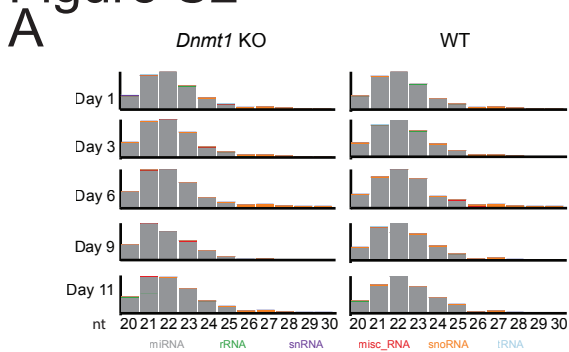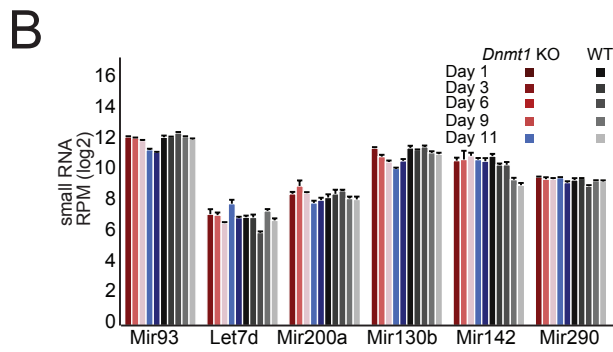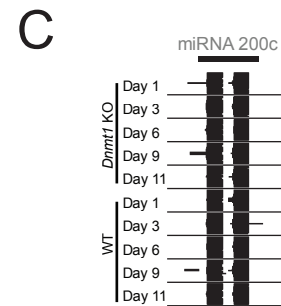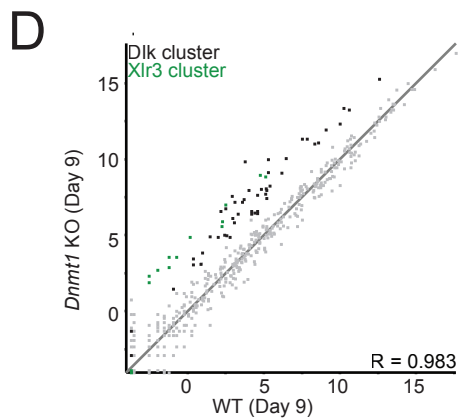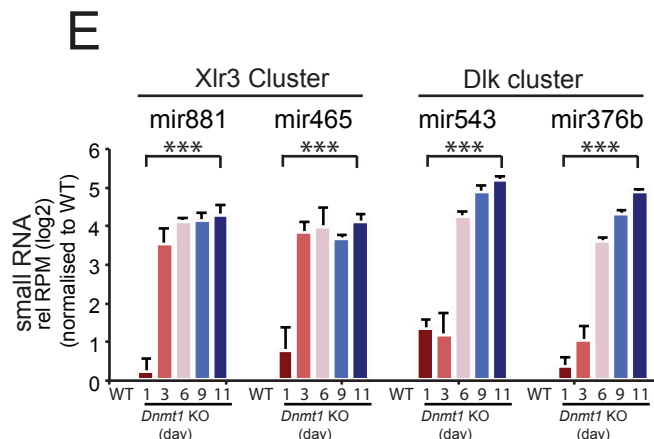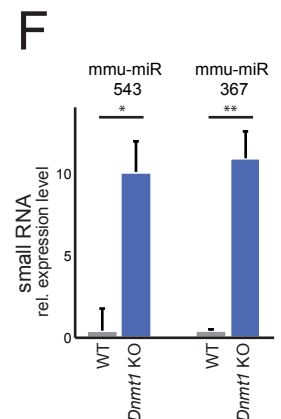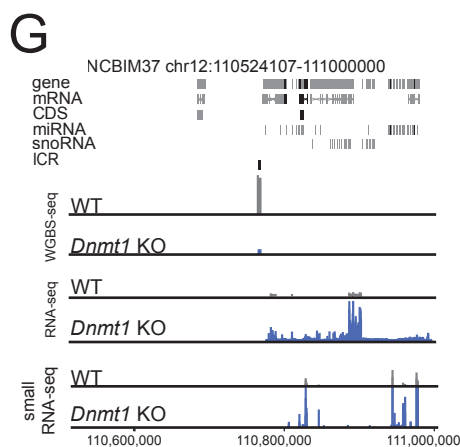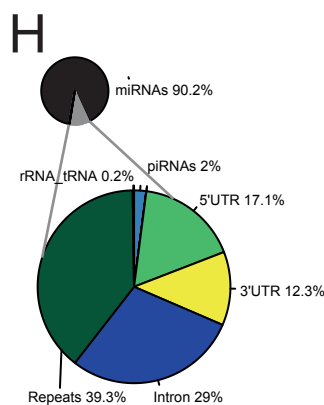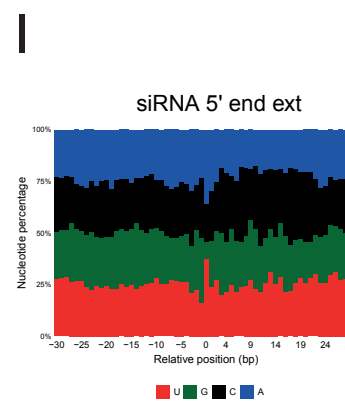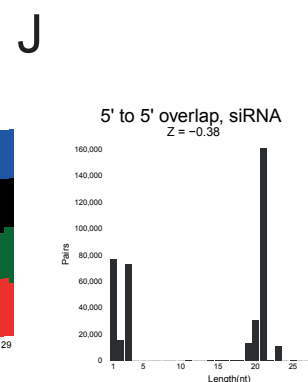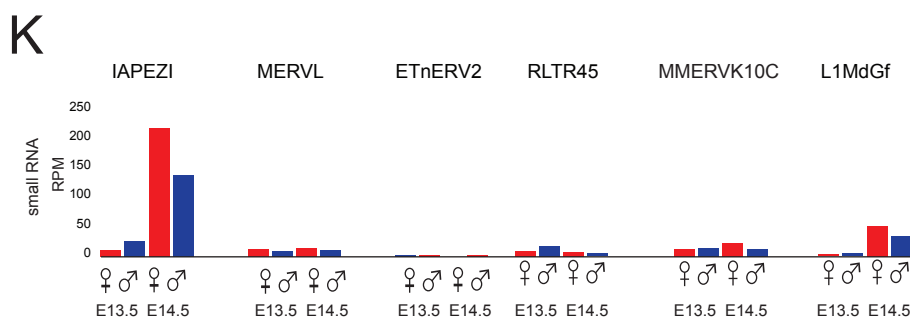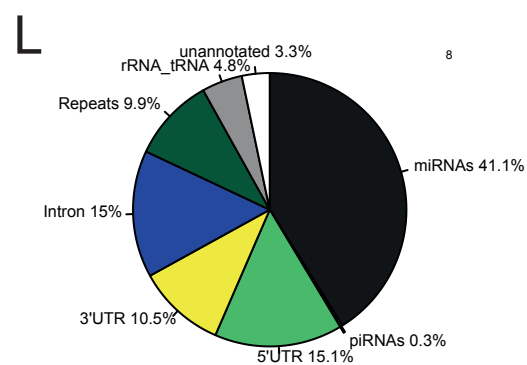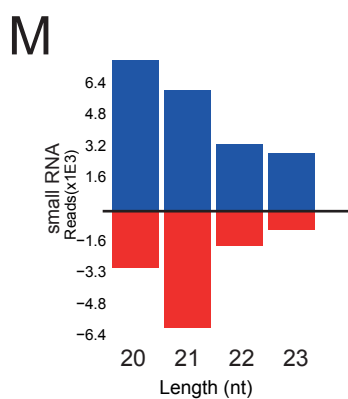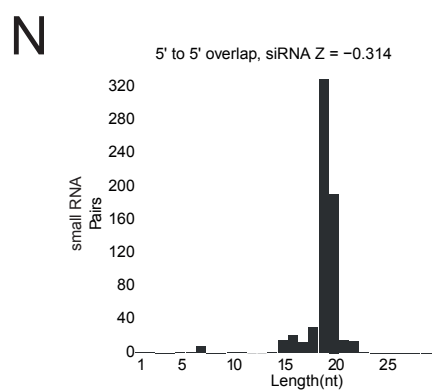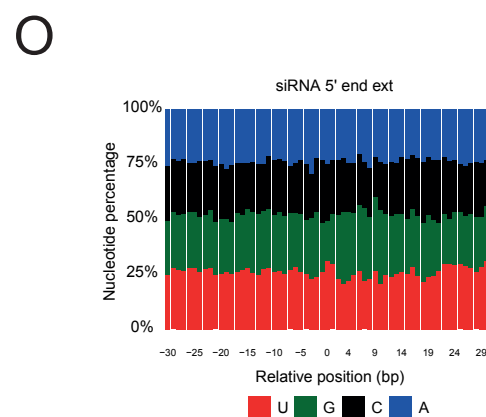

# Figure S3

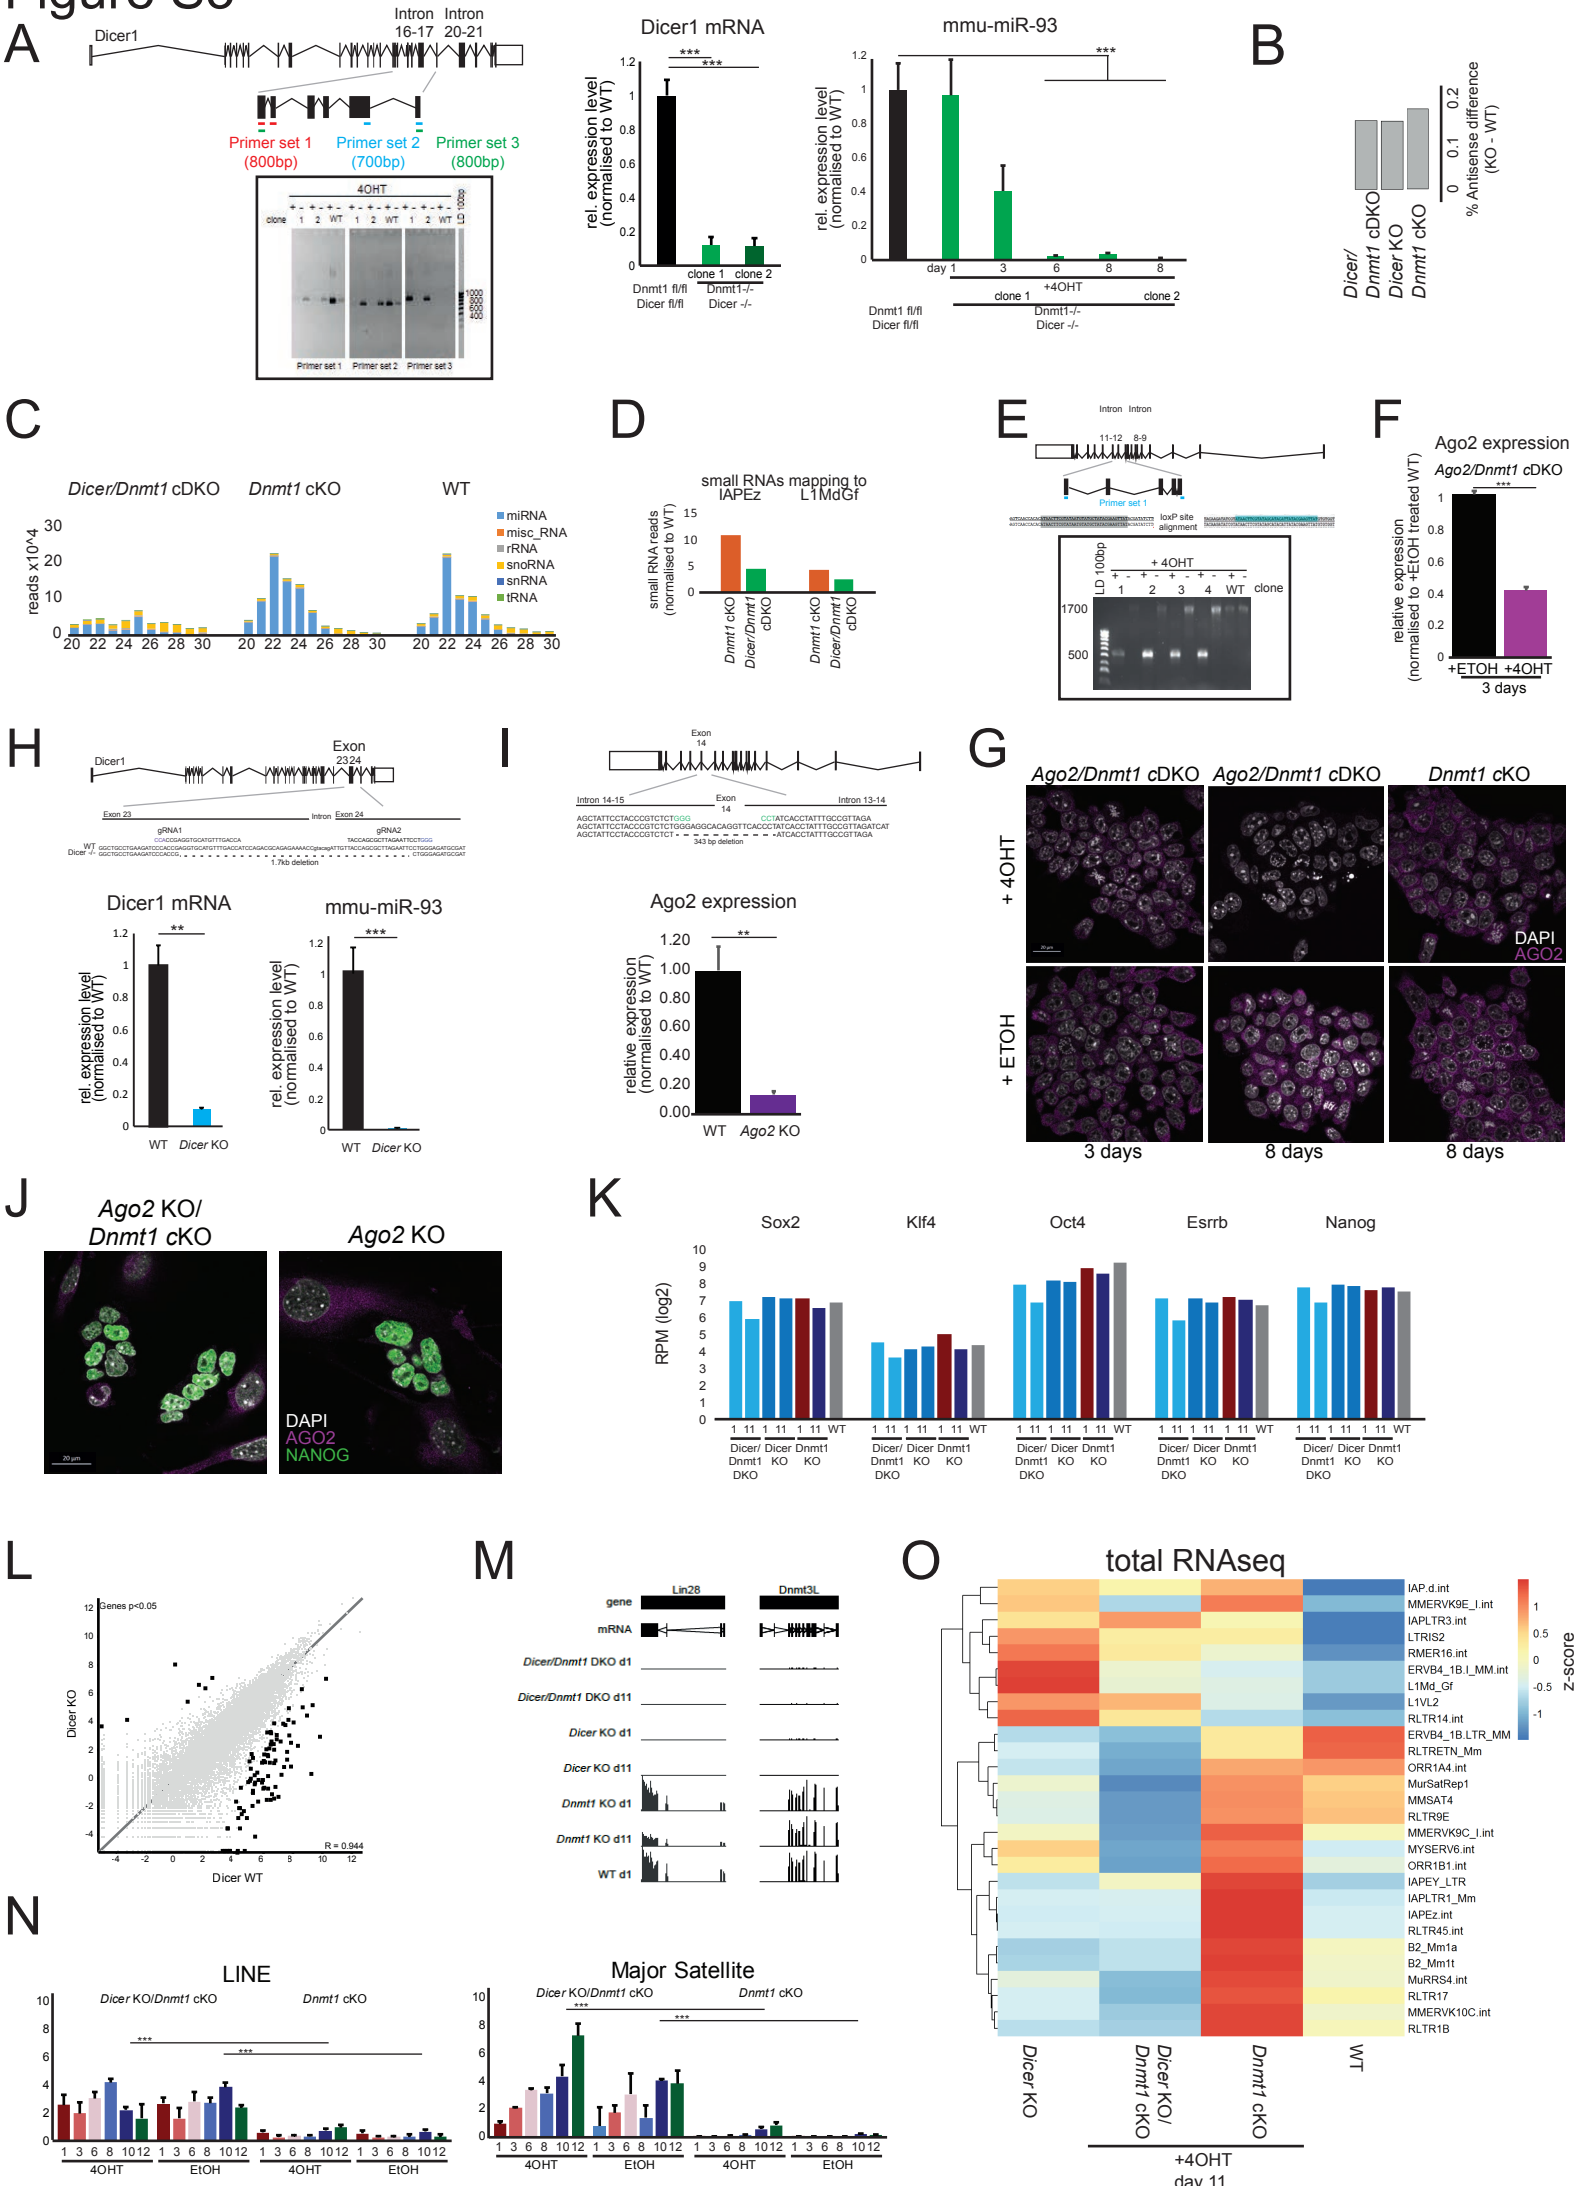

# Figure S4

## A

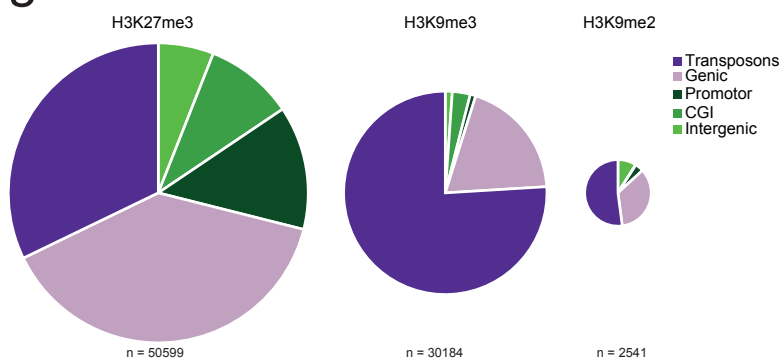

## B

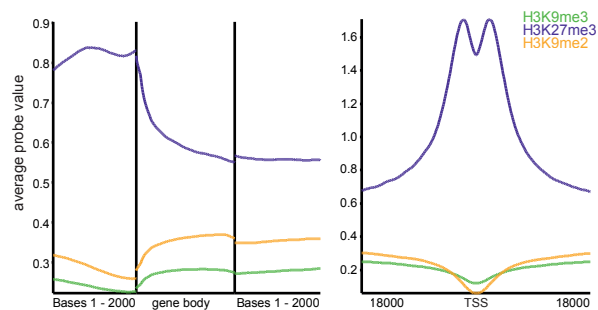

## C

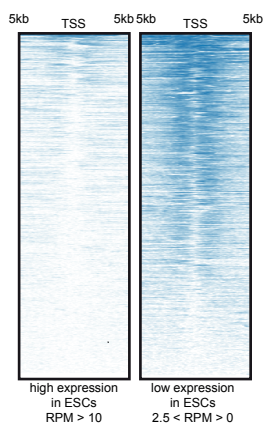

## D

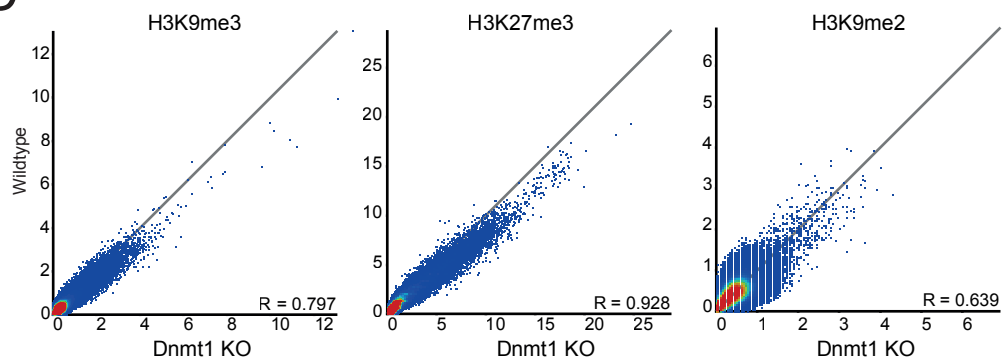

## E

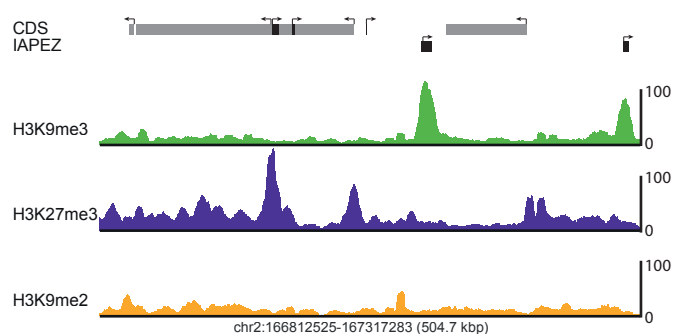

## F

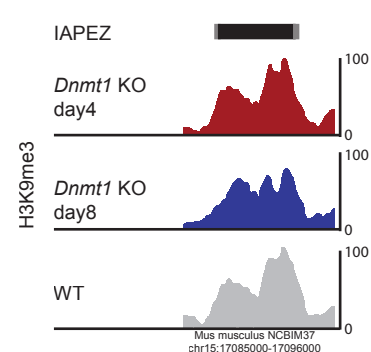

## G

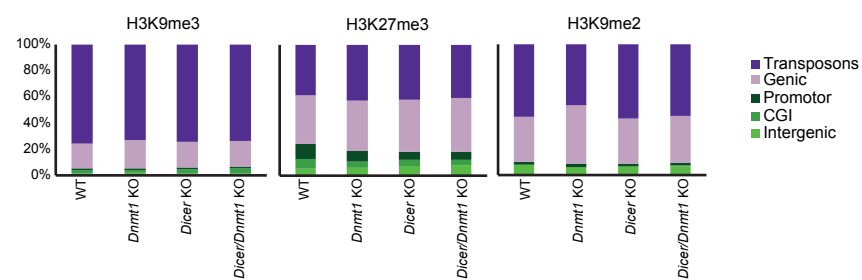

## H

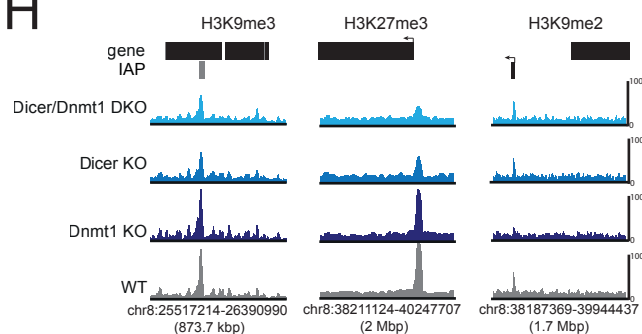

## I

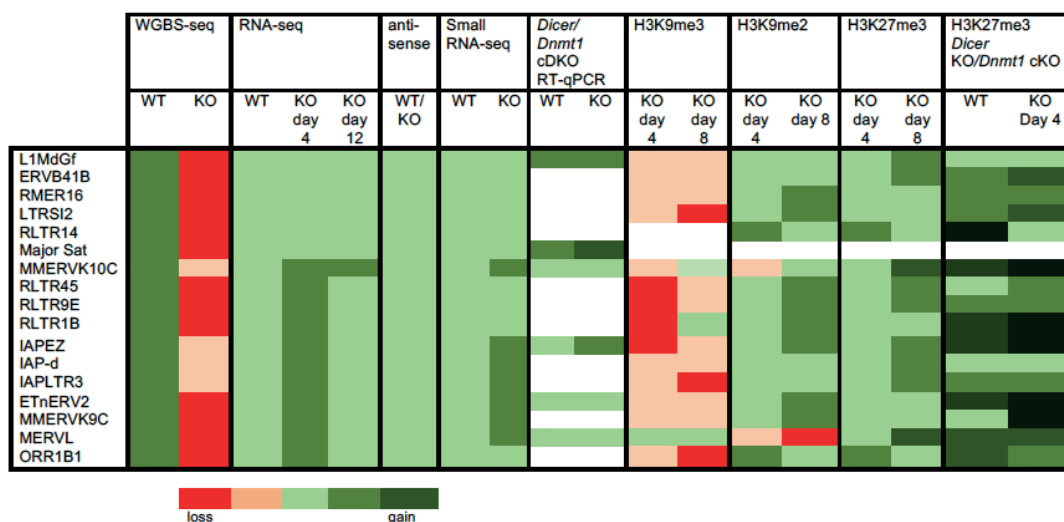

**Table S2: RT-qPCR primers, Related to Figure 3 and S3**

| Gene      | Primer               | Sequence                       | origin                |
|-----------|----------------------|--------------------------------|-----------------------|
| Hspcb     | msRT_Hspcb_FW        | GCTGGCTGAGGACAAGGAGA           |                       |
|           | msRT_Hspcb_RV        | CGTCGGTTAGTGGAACTTTCATG        |                       |
| Atp5b     | msRT_Atp5b_FW        | GGCCAAGATGTCCTGCTGTT           |                       |
|           | msRT_Atp5b_RV        | GCTGGTAGCCTACAGCAGAAGG         |                       |
| Dicer     | Dicer_RT_17_18_FW    | GCATTCCTAGCACCAAGTATTCA        | This study            |
|           | Dicer_RT_17_18_RV    | GGAAGGAAATTTACTGAGTGGGG        | This study            |
|           | Dicer_RT_FW          | GAACGAAATGCAAGGAATGGA          |                       |
|           | Dicer_RT_RV          | GGGACTTCGATATCCTCTTCTTTCTC     |                       |
| Ago2      | Eif2c2_FW            | GCCGTCCTTCCCCTACCAC            |                       |
|           | Eif2c2_RV            | GGTATTGACACAGAGCGTGTGC         |                       |
| Dgcr8     | Dgcr8_FW             | CCTAAAGACAGTGAAGAACTGGAGTA     |                       |
|           | Dgcr8_RV             | CATGGAGGATCTGATATGGAGAC        |                       |
| IAP       | IAP_Nature_qPCR_FW   | AAGCAGCAATCACCCACTTTGG         | (ref)                 |
|           | IAP_Nature_qPCR_RV   | CAATCATTAGATGTGGCTGCCAAG       | (ref)                 |
| MERVL     | MuERV-L gag_Jafar_FW | TTCTTCTAGACCTGTAACCAGACTCA     | (Sharif et al., 2016) |
|           | MuERV-L gag_Jafar_RV | TCCTTAGTAGTGTAGCGAATTTCTC      | (Sharif et al., 2016) |
| Etn       | MusD_Nature_qPCR_FW  | GTGGTATCTCAGGAGGAGTGCC         |                       |
|           | MusD_Nature_qPCR_RV  | GGGCAGCTCCTCTATCTGAGTG         |                       |
| U1        | U1_AP_FW             | CTTACCTGGCAGGGGAGATA           |                       |
|           | U1_AP_RV             | CAGTCCCCCACTACCACAAA           |                       |
| Maj. Sat. | MajSat_BL_FW         | GACGACTTGAAAAATGACGAAATC       |                       |
|           | MajSat_BL_RV         | CATATTCCAGGTCCTTCAGTGTGC       |                       |
| MMERVK10C | MmERVK10C_FW         | ATGTGAGCTAGCTGTTAAAGAAGGAC     |                       |
|           | MmERVK10C_RV         | CTCTCTGTTTCTGACATACTTTCCTGT    |                       |
| LINEI     | LINE ORF2_JS_FW      | GACATAGACTAACAACTGGCTACACAAAC  | (Sharif et al., 2016) |
|           | LINE ORF2_JS_RV      | GGTAGTGTCTATCTTTTTCTCTGAGATGAG | (Sharif et al., 2016) |

**Table S3: CRISPR primers, Related to Figure 3 and S3**

| Gene                               | Primer                                                                                                                                                                                                               | Sequence (5'-3')                                                                                                                                                                                                    |            |
|------------------------------------|----------------------------------------------------------------------------------------------------------------------------------------------------------------------------------------------------------------------|---------------------------------------------------------------------------------------------------------------------------------------------------------------------------------------------------------------------|------------|
| U6                                 | U6-Fwd                                                                                                                                                                                                               | GAGGGCCTATTTCCCATGATTCC                                                                                                                                                                                             | PCR screen |
| <i>Dicer</i> KO / <i>Dnmt1</i> cKO | <i>Dicer1_X23_gRNA_FW</i>                                                                                                                                                                                            | CACCGAGTAATCAAAAGGACCAGCC                                                                                                                                                                                           | gRNA       |
|                                    | <i>Dicer1_X23_gRNA_RV</i>                                                                                                                                                                                            | AAACGGCTGGTCCTTTTGATTACTC                                                                                                                                                                                           | gRNA       |
|                                    | <i>Dicer1_X24_gRNA_FW</i>                                                                                                                                                                                            | CACCGTTACCAGCGCTTAGAATTCC                                                                                                                                                                                           | gRNA       |
|                                    | <i>Dicer1_X24_gRNA_RV</i>                                                                                                                                                                                            | AAACGGAATTCTAAGCGCTGGTAAC                                                                                                                                                                                           | gRNA       |
|                                    | <i>Dicer_23_24_screen_FW</i>                                                                                                                                                                                         | AGCAGTGCATTGCTGACAAGAG                                                                                                                                                                                              | PCR screen |
|                                    | <i>Dicer_23_24_screen_RV</i>                                                                                                                                                                                         | CTTGTGGTAGTCATACTTCACAGCC                                                                                                                                                                                           | PCR screen |
| <i>Dicer/Dnmt1</i> cDKO            | <i>Dicer_14_15_gRNA_FW</i>                                                                                                                                                                                           | CACCGCACTCAGCATCGAGTCTCG                                                                                                                                                                                            | gRNA       |
|                                    | <i>Dicer_14_15_gRNA_RV</i>                                                                                                                                                                                           | AAACCGAGACTCGATGCTGAGTGCC                                                                                                                                                                                           | gRNA       |
|                                    | <i>Dicer_20_21_gRNA_FW</i>                                                                                                                                                                                           | CACCGAGCAATGATCCGGTCTCAGG                                                                                                                                                                                           | gRNA       |
|                                    | <i>Dicer_20_21_gRNA_RV</i>                                                                                                                                                                                           | AAACCCTGAGACCGGATCATTGCTC                                                                                                                                                                                           | gRNA       |
|                                    | <i>Dicer_14_15_RV1</i>                                                                                                                                                                                               | TGAAACCAGACTTCTTCAGCTCG                                                                                                                                                                                             | PCR screen |
|                                    | <i>Dicer_14_15_FW1</i>                                                                                                                                                                                               | CCTTTCCTCTTGACATTTACCT                                                                                                                                                                                              | PCR screen |
|                                    | <i>Dicer_2021_FW1</i>                                                                                                                                                                                                | GGTGTCAGATCACTTCCCCT                                                                                                                                                                                                | PCR screen |
|                                    | <i>Dicer_2021_RV1</i>                                                                                                                                                                                                | TGACCAGAATAAGAAGGAGCGGA                                                                                                                                                                                             | PCR screen |
|                                    | <i>Dicer_20_21_donor_loxP</i>                                                                                                                                                                                        | gacaaggaccactgtactgtttatccctgaagtagcagactagacca<br>ttgagatctgtcaagttagagagcagcaagaattctATAACTTC<br>GTATAGCATACATTATACGAAGTTATgagaccggat<br>cattgctcctgtagcagtgatgctggaataggggtgagaatggatata<br>gttcttctcaaaactaa    | Donor DNA  |
| <i>Dicer_14_15_donor_loxP</i>      | ggcaagaaaagacatttattctggttggtgggtaacaaagcagc<br>agcagcagctcagaaggcactcagcatcgagtctATAACTTC<br>GTATAATGTATGCTATACGAAGTTATcgatcgaagc<br>cagagctgcacactgcccaattttacctatgctgcttattacagtttatg<br>gaatatcaaaagtatttaaaatag | Donor DNA                                                                                                                                                                                                           |            |
| <i>Ago2</i> KO/ <i>Dnmt1</i> cKO   | <i>Ago2_13_14_gRNA_FW</i>                                                                                                                                                                                            | CACCGCTGGTCTAATCATGATCTAA                                                                                                                                                                                           | gRNA       |
|                                    | <i>Ago2_13_14_gRNA_RV</i>                                                                                                                                                                                            | AAACTTAGATCATGATTAGACCAGC                                                                                                                                                                                           | gRNA       |
|                                    | <i>Ago2_14_15_gRNA_FW</i>                                                                                                                                                                                            | CACCGAAGCTATTCTACCCGTCTC                                                                                                                                                                                            | gRNA       |
|                                    | <i>Ago2_14_15_gRNA_RV</i>                                                                                                                                                                                            | AAACGAGACGGGTAGGAATAGCTTC                                                                                                                                                                                           | gRNA       |
|                                    | <i>Ago2_13_14_FW</i>                                                                                                                                                                                                 | AGGCTACCTTGATGGACATGG                                                                                                                                                                                               | PCR screen |
|                                    | <i>Ago2_14_15_RV</i>                                                                                                                                                                                                 | GATGGGTTTGGTGGTACATGC                                                                                                                                                                                               | PCR screen |
| <i>Ago2/Dnmt1</i> cDKO             | <i>Ago2_8_9_gRNA_FW</i>                                                                                                                                                                                              | CACCGGTTACCTACAAGTTGTGTG                                                                                                                                                                                            | gRNA       |
|                                    | <i>Ago2_8_9_gRNA_RV</i>                                                                                                                                                                                              | AAACCACACAACCTGTAGGTAACC                                                                                                                                                                                            | gRNA       |
|                                    | <i>Ago2_11_12_gRNA_FW</i>                                                                                                                                                                                            | CACCGGTTGGTCAGACGGGTCACCG                                                                                                                                                                                           | gRNA       |
|                                    | <i>Ago2_11_12_gRNA_RV</i>                                                                                                                                                                                            | AAACAGGGTGACTGCCATTTATGAC                                                                                                                                                                                           | gRNA       |
|                                    | <i>Ago2_8_9_FW</i>                                                                                                                                                                                                   | CCTGCTCTTCTGGAGGCATTT                                                                                                                                                                                               | PCR screen |
|                                    | <i>Ago2_8_9_RV</i>                                                                                                                                                                                                   | CCTGCTCTTCTGGAGGCATTT                                                                                                                                                                                               | PCR screen |
|                                    | <i>Ago2_11_12_FW</i>                                                                                                                                                                                                 | GTCCAGGGTGTGTGGGACAT                                                                                                                                                                                                | PCR screen |
|                                    | <i>Ago2_11_12_RV</i>                                                                                                                                                                                                 | GCAACTTCCTCAGCTAATCCTCCA                                                                                                                                                                                            | PCR screen |
|                                    | <i>Ago2_8_9_donor_loxP</i>                                                                                                                                                                                           | ctcactgtgcacagggtcaagcccagcagagtgccaccaagctgta<br>gatggctcttctcatgccagggttacctacaagAtAtCgtATAAC<br>TTCGTATAGCATACATTATACGAAGTTATgtgtgggt<br>gactttggagtggtcccaccactagtcagggttggtctgctgctgta<br>ctcagcctctgaaatctcct | Donor DNA  |
| <i>Ago2_11_12_donor_loxP</i>       | tgttggtcagacgggtcaccgggttccaataccagcggttggcagc<br>cttctctaacagagagcactcaccaggATAACTTCGTATA<br>GCATACATTATACGAAGTTATgAAITCgactgcccattt<br>atgagatgtgacaagggccagattaggtgtgagagaaaacagctct<br>gagactgtagaactcactgtctat  | Donor DNA                                                                                                                                                                                                           |            |
